# Supplementary material
Source: publisher site journal article supplement (https://www.dovepress.com/article/481730)

**Dose escalation patterns and associated costs of advanced therapies for Ulcerative Colitis in France and the United Kingdom: a retrospective database analysis**

**Supplementary Data**

**Supplementary Table 1. Local codes used for UC diagnosis in the THIN-France and THIN-UK**

| ***Original local France codification*** | ***Local UK Codification*** |
| --- | --- |
| *BCB.10006445 Entéro-colite ulcéreuse (chronique)*  *BCB.10006452 Recto-colite hémorragique (RCH), sans précision*  *BCB.10006607 Colite hémorragique*  *BCB.10006446 Iléo-colite ulcéreuse (chronique)*  *BCB.10006454 Colite chronique ulcéreuse*  *BCB.10006453 Pan-colite ulcéreuse*  *BCB.10032466 Recto-colite hémoragique en rémission*  *BCB.10032216 Recto-colite hemorragique*  *BCB.40061 Rectocolite hémorragique (RCH)*  *BCB.10015677 Recto-colite émorragique en poussée*  *BCB.24020 Rectocolite hémorragique*  *BCB.10000999 Recto-colite hémorragique*  *BCB.10006447 Rectite ulcéreuse (chronique)*  *BCB.10006448 Recto-sigmoïdite ulcéreuse (chronique)* | *INUK.14C4.11 H/O: ulcerative colitis*  *INUK.J41.12 Ulcerative colitis and/or proctitis*  *INUK.J410.00 Ulcerative proctocolitis*  *INUK.J410000 Ulcerative ileocolitis*  *INUK.J410100 Ulcerative colitis*  *INUK.J410400 Exacerbation of ulcerative colitis*  *INUK.J411.00 Ulcerative (chronic) enterocolitis*  *INUK.J412.00 Ulcerative (chronic) ileocolitis*  *INUK.J413.00 Ulcerative pancolitis*  *INUK.Jyu4100 [X]Other ulcerative colitis*  *INUK.N031000 Arthropathy in ulcerative colitis*  *INUK.N045400 Juvenile arthritis in ulcerative colitis*  *INUK.J410300 Ulcerative proctitis*  *INUK.J410200 Ulcerative rectosigmoiditis*  *Rectocolitis, haemorrhagic*  *Rectocolitis, haemorrhagic (RCH)*  *Rectocolitis, haemorrhagic acute episode*  *Rectocolitis, haemorrhagic*  *Haemorrhagic colo-proctitis*  *Ulcerative proctitis (chronic)*  *Recto-sigmoiditis, ulcerative (chronic)* |
|
|
|
|
|
|
|
|
|
|

**Supplementary Table 2. UC advanced treatment drugs induction period length**

| **UC advanced therapy drug** | **Induction period** |
| --- | --- |
| Adalimumab | 2 weeks |
| Golimumab |
| Infliximab | 6 weeks |
| Vedolizumab |
| Tofacitinib | 8 weeks |
| Upadacitinib |
| Ustekinumab |

**Supplementary Table 3. Recommended doses for UC (except from the SPCs available in EMA website)**

| **Treatments** | **Recommended doses** |
| --- | --- |
| Adalimumab | First dose of 160 mg (two 80 mg injections in one day or one 80 mg injection per day for two consecutive days), followed by 80 mg (one 80 mg injection) two weeks later. Thereafter, the usual dose is 40 mg every other week. |
| Golimumab | Patients with body weight less than 80 kg:  The initial dose is 200 mg, followed by 100 mg at week 2.  Patients who have an adequate response should receive 50 mg at week 6 and every 4 weeks thereafter.  Patients who have an inadequate response may benefit from continuing with 100 mg at week 6 and every 4 weeks thereafter.  Patients with body weight greater than or equal to 80 kg  Golimumab given as an initial dose of 200 mg, followed by 100 mg at week 2, then 100 mg every 4 weeks, thereafter.  Available data suggest that clinical response is usually achieved within 12-14 weeks of treatment. |
| Infliximab | The posology is 5 mg/kg given as an intravenous infusion followed by additional 5 mg/kg infusion doses at 2 and 6 weeks after the first infusion, then every 8 weeks thereafter.  Available data suggest that the clinical response is usually achieved within 14 weeks of treatment, i.e., three doses.  Continued therapy should be carefully reconsidered in patients who show no evidence of therapeutic benefit within this time period. |
| Tofacitinib | In induction, the recommended dose is 10 mg given orally twice daily for 8 weeks.  For patients who do not achieve adequate therapeutic benefit by week 8, the induction dose of 10 mg twice daily can be extended for an additional 8 weeks (16 weeks total), followed by 5 mg twice daily for maintenance.  Tofacitinib induction therapy should be discontinued in any patient who shows no evidence of therapeutic benefit by week 16.  The recommended dose for maintenance treatment is tofacitinib 5 mg given orally twice daily.  Tofacitinib 10 mg twice daily for maintenance treatment is not recommended in patients with UC who have known venous thromboembolism (VTE), major adverse cardiovascular events (MACE) and malignancy risk factors, unless there is no suitable alternative treatment available.  For patients with UC who are not at increased risk for VTE, MACE and malignancy tofacitinib 10 mg orally twice daily may be considered if the patient experiences a decrease in response on tofacitinib 5 mg twice daily and failed to respond to alternative treatment options for ulcerative colitis such as tumour necrosis factor inhibitor (TNF inhibitor) treatment.  Tofacitinib 10 mg twice daily for maintenance treatment should be used for the shortest duration possible. The lowest effective dose needed to maintain response should be used.  Retreatment in UC  If therapy is interrupted, restarting treatment with tofacitinib can be considered. If there has been a loss of response, reinduction with tofacitinib 10 mg twice daily may be considered. The treatment interruption period in clinical studies extended up to 1 year. Efficacy may be regained by 8 weeks of 10 mg twice daily therapy. |
| Upadacitinib | The recommended induction dose is 45 mg once daily for 8 weeks.   For patients who do not achieve adequate therapeutic benefit by week 8, upadacitinib 45 mg once daily may be continued for an additional 8 weeks.  Upadacitinib should be discontinued in any patient who shows no evidence of therapeutic benefit by week 16.  The recommended maintenance dose of upadacitinib is 15 mg or 30 mg once daily based on individual patient presentation:   - A dose of 15 mg is recommended for patients at higher risk of venous thromboembolism (VTE), major adverse cardiovascular event (MACE) and malignancy. - A dose of 30 mg once daily may be appropriate for some patients, such as those with high disease burden or requiring 16-week induction treatment who are not at higher risk of VTE, MACE and malignancy or who do not show adequate therapeutic benefit to 15 mg once daily. - The lowest effective dose to maintain response should be used.   For patients 65 years of age and older, the recommended dose is 15 mg once daily. |
| Ustekinumab | Initial intravenous dose:   | **Body weight of patient**  **at the time of dosing** | **Recommended**  **dosea** | **Number of vials (130 mg each)** | | --- | --- | --- | | ≤ 55 kg | 260 mg | 2 | | > 55 kg to ≤ 85 kg | 390 mg | 3 | | > 85 kg | 520 mg | 4 |    The first subcutaneous dose should be given at week 8 following the intravenous dose.  The first subcutaneous administration of 90 mg Ustekinumab (STELARA) should take place at week 8 after the intravenous dose. After this, dosing every 12 weeks is recommended.   Patients who have not shown adequate response at 8 weeks after the first subcutaneous dose, may receive a second subcutaneous dose at this time.   Patients who lose response on dosing every 12 weeks may benefit from an increase in dosing frequency to every 8 weeks.  Patients may subsequently be dosed every 8 weeks or every 12 weeks according to clinical judgment.   Consideration should be given to discontinuing treatment in patients who show no evidence of therapeutic benefit 16 weeks after the IV induction dose or 16 weeks after switching to the 8-weekly maintenance dose. |
| Vedolizumab | Recommended dose: 300 mg intravenously at 0, 2 and 6 weeks and then every 8 weeks thereafter.  Some patients who have experienced a decrease in their response may benefit from an increase in dosing frequency to intravenous vedolizumab 300 mg every 4 weeks. In patients who have responded to treatment with vedolizumab, corticosteroids may be reduced and/or discontinued in accordance with standard of care |

**Supplementary Table 4. Unit costs for direct HRU**

| **Resource** | **Label / code in THIN database** | **Unit Cost** |
| --- | --- | --- |
| **France** (in €) |  |  |
| Consultation | General medicine/practitioners | 23.00 |
|  | Hepato/gastroenterologists | 23.00 |
|  | Endocrinologists | 23.00 |
| Drug | adalimumab | 279.77 |
|  | adalimumab | 503.47 |
|  | adalimumab | 813.56 |
|  | adalimumab | 813.56 |
|  | adalimumab | 503.47 |
|  | adalimumab | 613.78 |
|  | adalimumab | 503.47 |
|  | adalimumab | 503.47 |
|  | adalimumab | 1446.75 |
|  | adalimumab | 422.32 |
|  | adalimumab | 823.92 |
|  | adalimumab | 1218.38 |
|  | adalimumab | 212.07 |
|  | adalimumab | 422.32 |
|  | adalimumab | 823.92 |
|  | adalimumab | 1218.38 |
|  | adalimumab | 212.07 |
|  | adalimumab | 422.32 |
|  | adalimumab | 823.92 |
|  | adalimumab | 422.32 |
|  | adalimumab | 118.07 |
|  | adalimumab | 422.32 |
|  | adalimumab | 823.92 |
|  | adalimumab | 1218.38 |
|  | adalimumab | 422.32 |
|  | adalimumab | 823.92 |
|  | adalimumab | 1218.38 |
|  | adalimumab | 212.07 |
|  | adalimumab | 212.07 |
|  | filgotinib | 590.58 |
|  | filgotinib | 590.58 |
|  | golimumab | 699.67 |
|  | golimumab | 699.67 |
|  | golimumab | 699.67 |
|  | golimumab | 699.67 |
|  | infliximab | 190.38 |
|  | infliximab | 378.95 |
|  | infliximab | 190.38 |
|  | infliximab | 378.95 |
|  | risankizumab | 2742.74 |
|  | risankizumab | 2742.74 |
|  | risankizumab | 2742.74 |
|  | tofacitinib | 1310.74 |
|  | tofacitinib | 672.55 |
|  | tofacitinib | 672.55 |
|  | upadacitinib | 626.48 |
|  | upadacitinib | 1218.61 |
|  | ustekinumab | 2175.61 |
|  | ustekinumab | 2175.61 |
|  | ustekinumab | 2175.61 |
|  | vedolizumab | 333.35 |
|  | vedolizumab | 657.00 |
|  | vedolizumab | 333.35 |
|  | vedolizumab | 657.00 |
| Hospitalization | K51 | 209.40 |
|  | K51 | 2536.43 |
|  | K52 | 492.17 |
|  | K52 | 2652.24 |
|  | R10.4 | 418.29 |
|  | R10.4 | 1892.77 |
|  | Z03.9 | 507.65 |
|  | Z00.0 | 507.65 |
|  | Z54 | 1798.94 |
|  | AFFECTIONS SEVERES DU TUBE DIGESTIF NIVEAU 2 | 2147.66 |
|  | AUTRES AFFECTIONS DIGESTIVES AGE SUPERIEUR A 17 ANS NIVEAU 1 | 865.12 |
|  | AUTRES GASTROENTERITES ET MALADIES DIVERSES DU TUBE DIGESTIF AGE SUPERIEUR A 17 ANS NIVEAU 1 | 940.37 |
|  | AUTRES GASTROENTERITES ET MALADIES DIVERSES DU TUBE DIGESTIF AGE SUPERIEUR A 17 ANS NIVEAU 2 | 1672.40 |
|  | AUTRES GASTROENTERITES ET MALADIES DIVERSES DU TUBE DIGESTIF AGE SUPERIEUR A 17 ANS NIVEAU 3 | 2652.24 |
|  | AUTRES GASTROENTERITES ET MALADIES DIVERSES DU TUBE DIGESTIF AGE SUPERIEUR A 17 ANS TRES COURTE DUREE | 492.17 |
|  | AUTRES SYMPTOMES ET MOTIFS DE RECOURS AUX SOINS DE LA CMD 23 | 1516.51 |
|  | AUTRES SYMPTOMES ET MOTIFS DE RECOURS AUX SOINS DE LA CMD 23 TRES COURTE DUREE | 507.65 |
|  | AUTRES TROUBLES DE LA LIGNEE ERYTHROCYTAIRE AGE SUPERIEUR A 17 ANS NIVEAU 4 | 5010.27 |
|  | AUTRES TROUBLES DE LA LIGNEE ERYTHROCYTAIRE AGE SUPERIEUR A 17 ANS TRES COURTE DUREE | 541.90 |
|  | Autres facteurs influant sur l’Ã©tat de santÃ©, trÃ¨s courte durÃ©e | 497.38 |
|  | CHOLECYSTECTOMIES SANS EXPLORATION DE LA VOIE BILIAIRE PRINCIPALE POUR AFFECTIONS AIGUES NIVEAU 4 | 7542.70 |
|  | DOULEURS ABDOMINALES NIVEAU 1 | 790.21 |
|  | DOULEURS ABDOMINALES NIVEAU 2 | 1262.02 |
|  | DOULEURS ABDOMINALES TRES COURTE DUREE | 418.29 |
|  | Douleurs abdominales | 418.29 |
|  | ENDOSCOPIE DIGESTIVE DIAGNOSTIQUE ET ANESTHESIE EN AMBULATOIRE | 411.39 |
|  | ENDOSCOPIES DIGESTIVES THERAPEUTIQUES ET ANESTHESIE SEJOURS DE MOINS DE 2 JOURS | 531.81 |
|  | EXPLORATIONS ET SURVEILLANCE POUR AFFECTIONS DE L APPAREIL DIGESTIF | 600.79 |
|  | FIEVRES D ETIOLOGIE INDETERMINEE AGE SUPERIEUR A 17 ANS NIVEAU 1 | 843.49 |
|  | FIEVRES D ETIOLOGIE INDETERMINEE AGE SUPERIEUR A 17 ANS NIVEAU 2 | 1463.43 |
|  | GASTROENTEROLOGIE | 23.00 |
|  | HEPATO GASTRO ENTEROLOGIE | 23.00 |
|  | HÃ©morragies digestives | 2969.63 |
|  | INTERVENTIONS DIGESTIVES AUTRES QUE LES GASTROPLASTIES POUR OBESITE NIVEAU 2 | 4338.00 |
|  | INTERVENTIONS MAJEURES SUR L INTESTIN GRELE ET LE COLON NIVEAU 2 | 4980.59 |
|  | INTERVENTIONS MAJEURES SUR L INTESTIN GRELE ET LE COLON NIVEAU 3 | 6634.68 |
|  | INTERVENTIONS MINEURES SUR L INTESTIN GRELE ET LE COLON NIVEAU 2 | 3257.68 |
|  | INTERVENTIONS NON MINEURES SUR LES TISSUS MOUS EN AMBULATOIRE | 827.78 |
|  | INTERVENTIONS SUR LA REGION ANALE ET PERIANALE EN AMBULATOIRE | 556.86 |
|  | INTERVENTIONS SUR LE RECTUM ET L ANUS AUTRES QUE LES RESECTIONS RECTALES EN AMBULATOIRE | 642.01 |
|  | INTERVENTIONS SUR LE RECTUM ET L ANUS AUTRES QUE LES RESECTIONS RECTALES NIVEAU 1 | 642.01 |
|  | MALADIES INFLAMMATOIRES DE L INTESTIN NIVEAU 1 | 953.02 |
|  | MALADIES INFLAMMATOIRES DE L INTESTIN NIVEAU 2 | 1932.14 |
|  | MALADIES INFLAMMATOIRES DE L INTESTIN NIVEAU 3 | 2536.43 |
|  | MALADIES INFLAMMATOIRES DE L INTESTIN NIVEAU 4 | 4033.97 |
|  | MALADIES INFLAMMATOIRES DE L INTESTIN TRES COURTE DUREE | 209.40 |
|  | MEDECINE GENERALE ET SPECIALITES MEDICALES INDIFFERENCIEES | 23.00 |
|  | MEDECINE GENERALE OU POLYVALENTE | 23.00 |
|  | MEDECINE INTERNE | 23.00 |
|  | Maladies inflammatoires de l’intestin | 209.40 |
|  | MÃ©decine autres UM-HC | 23.00 |
|  | REGIME DIETETIQUE | 23.00 |
|  | RESECTIONS RECTALES NIVEAU 4 | 9499.42 |
|  | SEJOURS COMPRENANT UNE ENDOSCOPIE BRONCHIQUE EN AMBULATOIRE | 315.98 |
|  | SEJOURS COMPRENANT UNE ENDOSCOPIE DIGESTIVE DIAGNOSTIQUE SANS ANESTHESIE EN AMBULATOIRE | 283.71 |
|  | SEJOURS COMPRENANT UNE ENDOSCOPIE DIGESTIVE THERAPEUTIQUE SANS ANESTHESIE EN AMBULATOIRE | 396.23 |
|  | SERVICE D ACCUEIL ET DE TRAITEMENTS DES URGENCES (SAU) | 28.63 |
|  | SOINS HAUTEMENT SPECIALISES EN MEDECINE | 23.00 |
|  | SPECIALITES MEDICALES INDIFFERENCIEES | 23.00 |
|  | SYMPTOMES ET AUTRES RECOURS AUX SOINS DE LA CMD 06 | 1002.39 |
|  | UNITE DE PROXI D ACCUEIL DE TRAIT ET D ORIENT URGENCES (UPATOU) | 28.63 |
| **United Kingdom** (in £) |  |  |
| Consultation | General medicine/practitioners | 174.6408748 |
|  | Hepato/gastroenterologists | 182.9321808 |
|  | Endocrinologists | 220.7351175 |
|  | General Practitioners | 149 |
| Emergency room | Emergency hospital admission | 95.71 |
| Emergency room | Admit medical emergency unsp. | 95.71 |
|  | Admit hospital emergency NOS | 95.71 |
|  | Seen in emergency clinic | 66.93048832 |
|  | Seen in emergency clinic | 66.93048832 |
| Hospitalization | Discharge from hospital | 2055.391156 |
|  | Repeat Rx reviewed by hospital | 2055.391156 |
|  | Reviewed at hospital | 2055.391156 |
|  | Post hospital discharge medication reconciliation with pt | 2055.391156 |
|  | Post hospital dischrge med reconciliation with medical notes | 2055.391156 |
|  | Admit to intensive care unit | 2395.564786 |
|  | Emergency hospital admission | 95.71 |
|  | Admit medical emergency unsp. | 95.71 |
|  | Admit hospital emergency NOS | 95.71 |
|  | Non-urgent hospital admission | 1336.157147 |
|  | Day hospital care | 459.7700177 |
|  | Other hospital admission NOS | 2055.391156 |
|  | Discharged from hospital | 2055.391156 |
|  | Transferred from hospital | 2055.391156 |
|  | Casualty self-referral | 2055.391156 |
|  | Admission to hospital | 2055.391156 |
|  | Medical report received from hospital | 2055.391156 |
|  | Seen in emergency clinic | 66.93048832 |
|  | Seen in hospital casualty | 2055.391156 |
|  | Seen in hospital ward | 1336.157147 |
|  | Seen in emergency clinic | 66.93048832 |
|  | Hospital outpatient report | 2055.391156 |
|  | Discharge from hospital | 2055.391156 |
| Complementary therapy | Nutrition | 77.41433199 |
|  | Dietary advice | 77.41433199 |
|  | Folic acid supplementation | 77.41433199 |
|  | Folate supplementation | 77.41433199 |
|  | Referral to dietitian | 77.41433199 |
|  | Refer to dietician | 77.41433199 |
|  | Discharge by dietitian | 77.41433199 |
| Test | Airway Reversibility | 92.36837655 |
|  | Alanine Aminotransferase | 1.546069975 |
|  | Albumin | 1.546069975 |
|  | Albumin Creatinine Ratio | 1.546069975 |
|  | Alcohol test | 3.34936947 |
|  | Alkaline Phosphatase | 1.546069975 |
|  | Alpha fetoprotein | 1.546069975 |
|  | Amylase | 1.546069975 |
|  | Aspartate Aminotransferase | 1.546069975 |
|  | B12 Levels | 1.546069975 |
|  | Basophil count | 2.960773453 |
|  | Bilirubin | 1.546069975 |
|  | Blood glucose | 2.960773453 |
|  | Blood trace elements/vitamins | 1.546069975 |
|  | C Reactive protein | 1.546069975 |
|  | Calcium | 1.546069975 |
|  | Calcium adjusted | 1.546069975 |
|  | Cardiac enzymes | 1.546069975 |
|  | Complement tests | 1.546069975 |
|  | Creatine phosphokinase level | 1.546069975 |
|  | Creatinine clearance | 1.546069975 |
|  | Diabetic Retinopathy Screening | 87.13605232 |
|  | Digoxin blood level | 1.546069975 |
|  | Enzymes/Specific proteins | 1.546069975 |
|  | Eosinophil count | 2.960773453 |
|  | Erythrocyte sedimentation rate | 2.960773453 |
|  | FEV1/FVC | 92.36837655 |
|  | Fasting glucose | 2.960773453 |
|  | Folate level | 1.546069975 |
|  | Follicle Stimulating Hormone | 1.546069975 |
|  | Forced Expiratory Volume in 1 sec | 92.36837655 |
|  | Free Thyroxine | 1.546069975 |
|  | Free Tri-iodothyronine | 1.546069975 |
|  | Fructosamine | 1.546069975 |
|  | Gamma Glutamyl Transpeptidase | 1.546069975 |
|  | Gastrointestinal hormones | 1.546069975 |
|  | Glomerular Filtration Rate | 1.546069975 |
|  | HDL/LDL Ratio | 1.546069975 |
|  | Haemoglobin | 2.960773453 |
|  | Hb A1C – Diabetic control | 1.546069975 |
|  | High Density Lipoprotein | 1.546069975 |
|  | Human Chorionic Gonadotrophin | 1.546069975 |
|  | International normalised ratio | 1.546069975 |
|  | Intra Ocular Pressure Left | 85.86590155 |
|  | Intra Ocular Pressure Right | 85.86590155 |
|  | Lactate Dehydrogenase | 1.546069975 |
|  | Large unstained cells | 2.960773453 |
|  | Lithium levels | 1.546069975 |
|  | Low Density Lipoprotein | 1.546069975 |
|  | Lung Func after bronchodilation | 92.36837655 |
|  | Lung Func before bronchodilation | 92.36837655 |
|  | Luteinising Hormone | 1.546069975 |
|  | Lymphocyte count | 2.960773453 |
|  | MCH Hb Concentration | 2.960773453 |
|  | Mean corpuscular haemoglobin | 2.960773453 |
|  | Mean corpuscular volume | 2.960773453 |
|  | Monocyte count | 2.960773453 |
|  | Neutrophil count | 2.960773453 |
|  | Oestradiol level | 1.546069975 |
|  | Other Biochemistry tests | 3.34936947 |
|  | Other Lab Result Information | 3.34936947 |
|  | Other Laboratory tests | 3.34936947 |
|  | PF best ever | 92.36837655 |
|  | PF current | 92.36837655 |
|  | PF predicted | 92.36837655 |
|  | Packed Cell Volume | 2.960773453 |
|  | Partial thromboplastin time | 1.546069975 |
|  | Plasma viscosity | 2.960773453 |
|  | Platelets | 2.960773453 |
|  | Potassium | 1.546069975 |
|  | Progesterone | 1.546069975 |
|  | Prolactin level | 1.546069975 |
|  | Prostate specific antigen | 1.546069975 |
|  | Prothrombin time | 1.546069975 |
|  | RBC – Folate | 1.546069975 |
|  | Red blood cell count | 2.960773453 |
|  | Respiratory Rate | 92.36837655 |
|  | Reticulocytes | 2.960773453 |
|  | Rheumatoid factor | 7.607083198 |
|  | Serum ACTH | 1.546069975 |
|  | Serum Cyclosporin | 1.546069975 |
|  | Serum Fibrinogen Level | 1.546069975 |
|  | Serum Inorganic Phosphate | 1.546069975 |
|  | Serum Parathyroid Hormone | 1.546069975 |
|  | Serum bicarbonate | 1.546069975 |
|  | Serum chloride | 1.546069975 |
|  | Serum cholesterol | 1.546069975 |
|  | Serum cortisol | 1.546069975 |
|  | Serum creatinine | 1.546069975 |
|  | Serum electrolytes | 1.546069975 |
|  | Serum ferritin | 1.546069975 |
|  | Serum globulin | 1.546069975 |
|  | Serum growth hormone | 1.546069975 |
|  | Serum iron tests | 1.546069975 |
|  | Serum lactate | 1.546069975 |
|  | Serum osmolality | 1.546069975 |
|  | Sex Hormone Binding Globulin | 1.546069975 |
|  | Sodium | 1.546069975 |
|  | Temperature | 3.34936947 |
|  | Testosterone | 1.546069975 |
|  | Theophylline | 1.546069975 |
|  | Thrombin time | 1.546069975 |
|  | Thyroid Stimulating Hormone | 1.546069975 |
|  | Thyroxine | 1.546069975 |
|  | Total iron binding capacity | 1.546069975 |
|  | Total protein | 1.546069975 |
|  | Triglycerides | 1.546069975 |
|  | Triodothyronine | 1.546069975 |
|  | Tumour Markers | 7.607083198 |
|  | Urea – blood | 1.546069975 |
|  | Uric acid blood level | 1.546069975 |
|  | Urine Biochemistry | 1.546069975 |
|  | Urine dipstick for pH | 3.34936947 |
|  | Urine microalbumin | 1.546069975 |
|  | Very low density lipoprotein | 1.546069975 |
|  | Vital Capacity | 92.36837655 |
|  | White blood count | 2.960773453 |
|  | B12 & Folate level | 1.546069975 |
|  | Chlamydia | 8.526874649 |
|  | Clotting tests | 2.960773453 |
|  | Endoscopy | 557.8982619 |
|  | Faecal Occult Blood | 7.607083198 |
|  | Full blood count | 2.960773453 |
|  | Iron studies | 1.546069975 |
|  | Liver Function tests | 1.546069975 |
|  | Serology | 2.960773453 |
|  | Stool culture | 8.526874649 |
|  | Abdominal ultra-sound | 155.341697 |
|  | Pelvic ultra-sound | 71.91448084 |
|  | Urea and Electrolytes | 1.546069975 |
|  | Urine test | 1.546069975 |
|  | Other Diagnostic Imaging | 41.41087722 |
|  | Ankle X-ray | 41.41087722 |
|  | Pelvis X-ray | 41.41087722 |
|  | Urinalysis – Glucose | 1.546069975 |
|  | Urinalysis – Protein | 1.546069975 |
|  | Colonoscopy | 380.1029497 |
|  | Sigmoidoscopy | 380.1029497 |
|  | CAT scan | 90.11481754 |
|  | RBC red blood cell size | 2.960773453 |
|  | Differential white cell count | 2.960773453 |
|  | Chemical function tests | 1.546069975 |
|  | Examination of faeces | 8.526874649 |
|  | Infectious titres and antibodies | 8.526874649 |
|  | Anti smooth muscle autoantibodies | 7.607083198 |
|  | General ultra sound scan | 58.09754709 |
|  | Abdominal Xray | 41.41087722 |
|  | Ambulatory blood pressure | 3.34936947 |
|  | Urine dipstick for glucose | 1.546069975 |
|  | Urine dipstick for protein | 1.546069975 |
|  | Urine dipstick for ketones | 1.546069975 |
|  | Urine dipstick for blood | 2.960773453 |
|  | Urine Dipstick for Nitrites | 1.546069975 |
|  | Urine Leucocytes | 2.960773453 |
|  | Biochemical Screening Tests | 1.546069975 |
|  | Haematology Screening Tests | 2.960773453 |
| Drug | adalimumab | 400.18 |
|  | golimumab | 1648.82 |
|  | Infliximab | 498.28 |
|  | Ustekinumab | 1,510.60 |
|  | Filgotinib | 572.28 |
|  | Risankizumab | 3,111.85 |
|  | Tofacitinib | 1,083.32 |
|  | Upadacitinib | 747.03 |
|  | Vedolizumab | 1,886.36 |

**Supplementary Table 5. Study Disposition**

| Timeframe[*] |  |  | Adalimumab | Golimumab | Infliximab | Tofacitinib | Upadacitinib | Ustekinumab | Vedolizumab | | Total | |
| --- | --- | --- | --- | --- | --- | --- | --- | --- | --- | --- | --- | --- |
| **AT approach** | | | | | | | | | | | | |
| At Index Date | N of Patients |  | 836 | 132 | 314 | 71 | 1 | 55 | 254 | | 1663 | |
|  | Follow up time, days | Mean (SD) | 169 (254) | 304 (414) | 108 (221) | 142 (236) | 227 () | 95 (147) | 108 (201) | | 155 (259) | |
|  |  | Median (Q1, Q3) | 58 (1, 270) | 144 (13, 411) | 1 (1, 78) | 12 (1, 178) | 227 (227, 227) | 1 (1, 176) | 1 (1, 114) | | 30 (1, 222) | |
| From initiation to maintenance date | In Study |  | 494 (59.09%) | 98 (74.24%) | 100 (31.85%) | 30 (42.25%) | 1 (100%) | 19 (34.55%) | 96 (37.8%) | | 838 (50.39%) | |
|  | Study discontinued, n (%) |  | 342 (40.91%) | 34 (25.76%) | 214 (68.15%) | 41 (57.75%) | 0 (0%) | 36 (65.45%) | 158 (62.2%) | | 825 (49.61%) | |
|  |  | Drug Switch | 2 | 2 | 3 | 2 | 0 | 2 | 5 | | 16 | |
|  |  | Discontinued therapy | 166 | 18 | 86 | 17 | 0 | 18 | 70 | | 375 | |
|  |  | Discontinued follow-up | 174 | 14 | 125 | 22 | 0 | 16 | 83 | | 434 | |
|  |  | End of Data Availability[‡] | 0 | 0 | 0 | 0 | 0 | 0 | 0 | | 0 | |
| 6 months after Maintenance Date | In Study |  | 254 (51.42%) | 58 (59.18%) | 57 (57%) | 14 (46.67%) | 0 (0%) | 9 (47.37%) | 43 (44.79%) | | 435 (51.91%) | |
|  | Study discontinued, n (%) |  | 240 (48.58%) | 40 (40.82%) | 43 (43%) | 16 (53.33%) | 1 (100%) | 10 (52.63%) | 53 (55.21%) | | 403 (48.09%) | |
|  |  | Drug Switch | 17 | 5 | 3 | 1 | 0 | 2 | 2 | | 30 | |
|  |  | Discontinued therapy | 123 | 18 | 17 | 4 | 0 | 4 | 22 | | 188 | |
|  |  | Discontinued follow-up | 100 | 17 | 23 | 11 | 1 | 4 | 29 | | 185 | |
|  |  | End of Data Availability[‡] | 0 | 0 | 0 | 0 | 0 | 0 | 0 | | 0 | |
| 12 months after Maintenance Date | In Study |  | 120 (47.24%) | 37 (63.79%) | 31 (54.39%) | 8 (57.14%) | 0 (%) | 4 (44.44%) | 27 (62.79%) | | 227 (52.18%) | |
|  | Study discontinued, n (%) |  | 134 (52.76%) | 21 (36.21%) | 26 (45.61%) | 6 (42.86%) | 0 (%) | 5 (55.56%) | 16 (37.21%) | | 208 (47.82%) | |
|  |  | Drug Switch | 7 | 2 | 0 | 1 | 0 | 0 | 1 | | 11 | |
|  |  | Discontinued therapy | 43 | 9 | 2 | 0 | 0 | 0 | 1 | | 55 | |
|  |  | Discontinued follow-up | 84 | 10 | 24 | 5 | 0 | 5 | 13 | | 141 | |
|  |  | End of Data Availability[‡] | 0 | 0 | 0 | 0 | 0 | 0 | 1 | | 1 | |
| 18 months after Maintenance Date | In Study |  | 71 (59.17%) | 22 (59.46%) | 14 (45.16%) | 5 (62.5%) | 0 (%) | 0 (0%) | 10 (37.04%) | | 122 (53.74%) | |
|  | Study discontinued, n (%) |  | 49 (40.83%) | 15 (40.54%) | 17 (54.84%) | 3 (37.5%) | 0 (%) | 4 (100%) | 17 (62.96%) | | 105 (46.26%) | |
|  |  | Drug Switch | 1 | 0 | 0 | 0 | 0 | 1 | 1 | | 3 | |
|  |  | Discontinued therapy | 10 | 4 | 1 | 1 | 0 | 0 | 0 | | 16 | |
|  |  | Discontinued follow-up | 37 | 11 | 16 | 2 | 0 | 3 | 15 | | 84 | |
|  |  | End of Data Availability[‡] | 1 | 0 | 0 | 0 | 0 | 0 | 1 | | 2 | |
| 24 months after Maintenance Date | In Study |  | 31 (43.66%) | 14 (63.64%) | 8 (57.14%) | 2 (40%) | 0 (%) | 0 (%) | 6 (60%) | | 61 (50%) | |
|  | Study discontinued, n (%) |  | 40 (56.34%) | 8 (36.36%) | 6 (42.86%) | 3 (60%) | 0 (%) | 0 (%) | 4 (40%) | | 61 (50%) | |
|  |  | Drug Switch | 1 | 0 | 0 | 0 | 0 | 0 | 0 | | 1 | |
|  |  | Discontinued therapy | 8 | 1 | 0 | 0 | 0 | 0 | 0 | | 9 | |
|  |  | Discontinued follow-up | 31 | 7 | 6 | 3 | 0 | 0 | 4 | | 51 | |
|  |  | End of Data Availability[‡] | 0 | 0 | 0 | 0 | 0 | 0 | 0 | | 0 | |
|  | Study discontinued, n (%) |  | 31 (100%) | 14 (100%) | 8 (100%) | 2 (100%) | 0 (%) | 0 (%) | 6 (100%) | | 61 (100%) | |
|  |  | Drug Switch | 0 | 1 | 0 | 0 | 0 | 0 | 0 | | 1 | |
|  |  | Discontinued therapy | 6 | 2 | 0 | 0 | 0 | 0 | 0 | | 8 | |
|  |  | Discontinued follow-up | 24 | 9 | 7 | 2 | 0 | 0 | 5 | | 47 | |
|  |  | End of Data Availability[‡] | 1 | 2 | 1 | 0 | 0 | 0 | 1 | | 5 | |
| **ITT approach** | | | | | | | | | | | | |
| At Index Date | N of Patients |  | 836 | 132 | 314 | 71 | 1 | 55 | | 254 | | 1663 |
|  | Follow up time, days | Mean (STD) | 504 (499) | 664 (583) | 388 (479) | 331 (331) | 227 () | 344 (332) | | 374 (424) | | 462 (488) |
|  |  | Median (Q1 | 364 (73, 732) | 510 (195, 998) | 227 (1, 612) | 274 (8, 558) | 227 (227, 227) | 303 (1, 530) | | 264 (1, 543) | | 336 (15, 701) |
| From initiation to maintanance date | In Study |  | 662 (79.19%) | 118 (89.39%) | 189 (60.19%) | 49 (69.01%) | 1 (100%) | 39 (70.91%) | | 171 (67.32%) | | 1229 (73.9%) |
|  | Study discontinued, n (%) |  | 174 (20.81%) | 14 (10.61%) | 125 (39.81%) | 22 (30.99%) | 0 (0%) | 16 (29.09%) | | 83 (32.68%) | | 434 (26.1%) |
|  |  | Discontinued follow-up | 174 | 14 | 125 | 22 | 0 | 16 | | 83 | | 434 |
|  |  | End of Data Availability[‡] | 0 | 0 | 0 | 0 | 0 | 0 | | 0 | | 0 |
| 6 Months after Maintenance Date | In Study |  | 543 (82.02%) | 99 (83.9%) | 158 (83.6%) | 36 (73.47%) | 0 (0%) | 30 (76.92%) | | 131 (76.61%) | | 997 (81.12%) |
|  | Study discontinued, n (%) |  | 119 (17.98%) | 19 (16.1%) | 31 (16.4%) | 13 (26.53%) | 1 (100%) | 9 (23.08%) | | 40 (23.39%) | | 232 (18.88%) |
|  |  | Discontinued follow-up | 119 | 19 | 31 | 13 | 1 | 9 | | 40 | | 232 |
|  |  | End of Data Availability[‡] | 0 | 0 | 0 | 0 | 0 | 0 | | 0 | | 0 |
| 12 Months after Maintenance Date | In Study |  | 407 (74.95%) | 83 (83.84%) | 117 (74.05%) | 24 (66.67%) | 0 (%) | 19 (63.33%) | | 100 (76.34%) | | 750 (75.23%) |
|  | Study discontinued, n (%) |  | 136 (25.05%) | 16 (16.16%) | 41 (25.95%) | 12 (33.33%) | 0 (%) | 11 (36.67%) | | 31 (23.66%) | | 247 (24.77%) |
|  |  | Discontinued follow-up | 136 | 16 | 41 | 12 | 0 | 11 | | 30 | | 246 |
|  |  | End of Data Availability[‡] | 0 | 0 | 0 | 0 | 0 | 0 | | 1 | | 1 |
| 18 Months after Maintenance Date | In Study |  | 314 (77.15%) | 60 (72.29%) | 85 (72.65%) | 15 (62.5%) | 0 (%) | 10 (52.63%) | | 57 (57%) | | 541 (72.13%) |
|  | Study discontinued, n (%) |  | 93 (22.85%) | 23 (27.71%) | 32 (27.35%) | 9 (37.5%) | 0 (%) | 9 (47.37%) | | 43 (43%) | | 209 (27.87%) |
|  |  | Discontinued follow-up | 92 | 23 | 32 | 9 | 0 | 9 | | 42 | | 207 |
|  |  | End of Data Availability[‡] | 1 | 0 | 0 | 0 | 0 | 0 | | 1 | | 2 |
| 24 Months after Maintenance Date | In Study |  | 208 (66.24%) | 44 (73.33%) | 59 (69.41%) | 8 (53.33%) | 0 (%) | 7 (70%) | | 45 (78.95%) | | 371 (68.58%) |
|  | Study discontinued, n (%) |  | 106 (33.76%) | 16 (26.67%) | 26 (30.59%) | 7 (46.67%) | 0 (%) | 3 (30%) | | 12 (21.05%) | | 170 (31.42%) |
|  |  | Discontinued follow-up | 106 | 16 | 26 | 7 | 0 | 3 | | 12 | | 170 |
|  |  | End of Data Availability[‡] | 0 | 0 | 0 | 0 | 0 | 0 | | 0 | | 0 |
|  | Study discontinued, n (%) |  | 208 (100%) | 44 (100%) | 59 (100%) | 8 (100%) | 0 (%) | 7 (100%) | | 45 (100%) | | 371 (100%) |
|  |  | Discontinued follow-up | 207 | 42 | 58 | 8 | 0 | 7 | | 44 | | 366 |
|  |  | End of Data Availability[‡] | 1 | 2 | 1 | 0 | 0 | 0 | | 1 | | 5 |

*Timeframe: from initiation to maintenance date, from maintenance date to 6 months, from maintenance date to 12 months, from maintenance date to 18 months, from maintenance date to 24 months, from maintenance date to end of data availability
‡Data is only available up to 27 February 2023
N, Number of patients; SD, standard deviation

**Supplementary Table 6. Multivariate analysis of Hazard Ratios of Dose Escalation (Adjusted for propensity score IPTW)**

| Parameter | Statistics | Hazard Ratio | 95% Confidence Interval | P-value |
| --- | --- | --- | --- | --- |
| Drug | Adalimumab vs Golimumab | 0.76 | ( 0.57, 1.01) | 0.059 |
|  | Adalimumab vs Infliximab | 17.88 | ( 5.50, 58.12) | <0.001 |
|  | Adalimumab vs Tofacitinib | 1.76 | ( 0.74, 4.21) | 0.202 |
|  | Adalimumab vs Ustekinumab | 0.31 | ( 0.16, 0.61) | <0.001 |
|  | Adalimumab vs Vedolizumab | 2.78 | ( 1.44, 5.34) | 0.002 |
|  | Golimumab vs Infliximab | 23.52 | ( 7.12, 77.76) | <0.001 |
|  | Golimumab vs Tofacitinib | 2.32 | ( 0.95, 5.68) | 0.066 |
|  | Golimumab vs Ustekinumab | 0.40 | ( 0.20, 0.83) | 0.013 |
|  | Golimumab vs Vedolizumab | 3.65 | ( 1.84, 7.26) | <0.001 |
|  | Infliximab vs Tofacitinib | 0.10 | ( 0.02, 0.42) | 0.002 |
|  | Infliximab vs Ustekinumab | 0.02 | ( 0.00, 0.07) | <0.001 |
|  | Infliximab vs Vedolizumab | 0.16 | ( 0.04, 0.59) | 0.006 |
|  | Tofacitinib vs Ustekinumab | 0.17 | ( 0.06, 0.52) | 0.002 |
|  | Tofacitinib vs Vedolizumab | 1.58 | ( 0.54, 4.60) | 0.406 |
|  | Ustekinumab vs Vedolizumab | 9.03 | ( 3.58, 22.73) | <0.001 |
| Concomitant Medication | Yes vs No | 1.44 | ( 1.13, 1.85) | 0.004 |

IPTW, Inverse Probability Treatment Weighting

**Supplementary Figure 1.** **A)** Percentage of patients with dose de-escalation (i.e., received an average daily dose <20% lower than specified in the label), according to the less stringent criteria, during the maintenance phase until 24 months of follow-up, by treatment cohort. **B)** Kaplan-Meier curve for time to first dose de-escalation by treatment cohort (less stringent criteria).


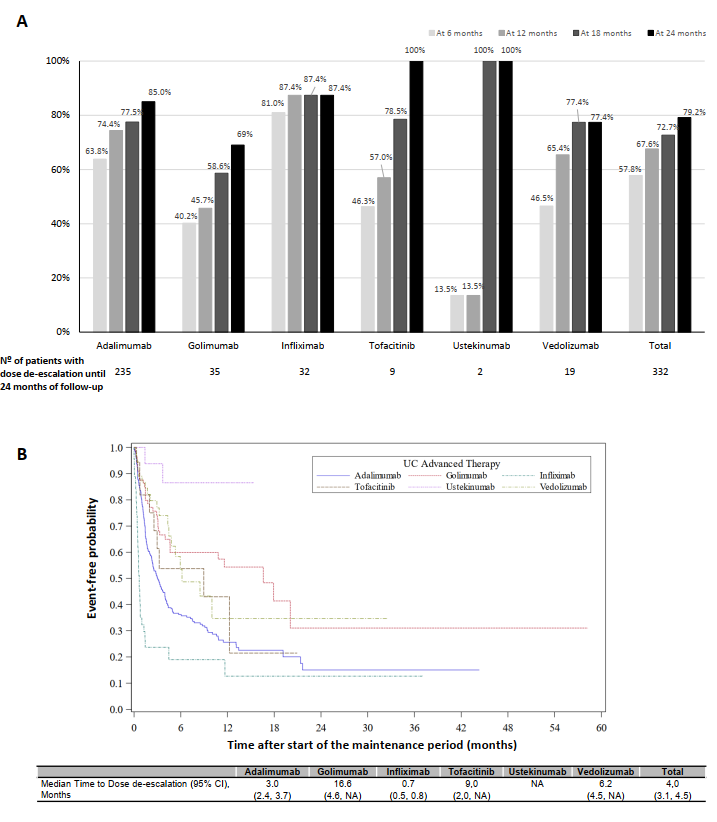


**Supplementary Figure 2.** **A)** Percentage of patients with dose escalation (i.e., received an average daily dose >20% higher than specified in the label), according to the more stringent criteria, during the maintenance phase until 24 months of follow-up, by treatment cohort. **B)** Kaplan-Meier Curve for Time to First Dose Escalation by treatment cohort (more stringent criteria).


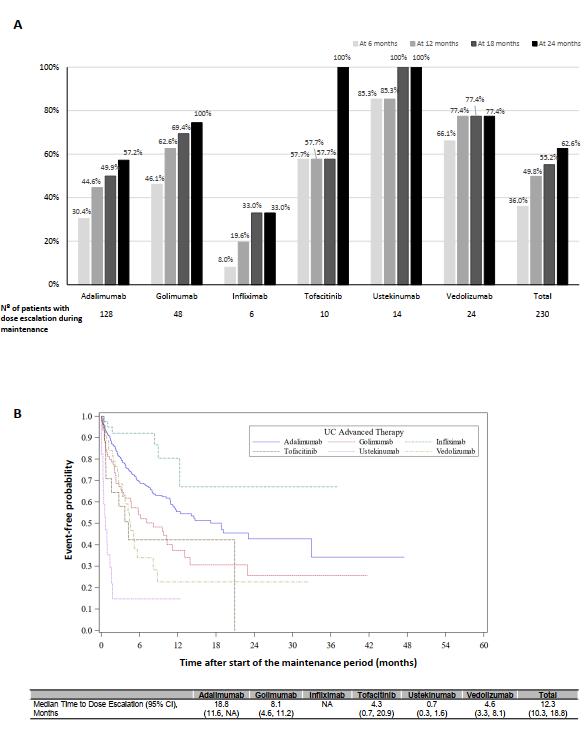


**Supplementary Figure 3.** Prior and concomitant use of corticosteroids by treatment cohort and overall


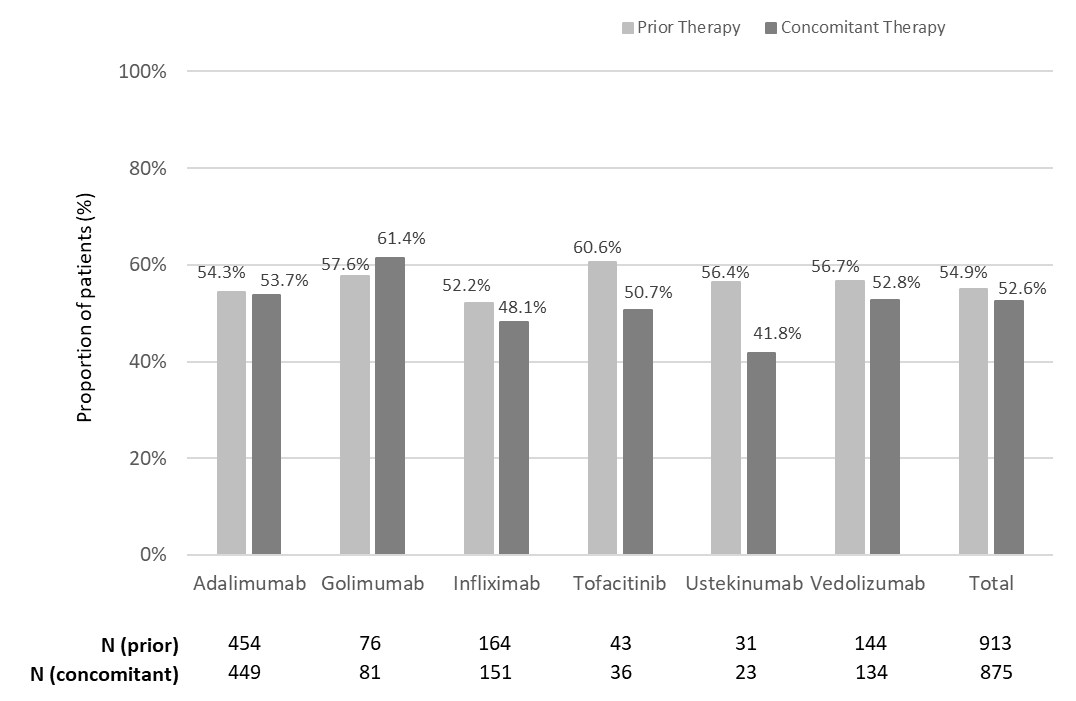

Supplement: Supplementary file 1 [file get_supplementary_file.php]
